# Supplementary material for: Construction and validation of a risk prediction model for postoperative pulmonary infection in patients with brain tumor: a retrospective study
Source: PeerJ journal article supplement (doi:10.7717/peerj.18996), 2025-03-31
Supplement: Supplemental_files.docx [file Supplemental_files.docx]

Supplemental files

**Supplementary Table 1 Comparison of clinical data between training set and** **validation set**

| Variables | Total  （n=636） | Training set（n=446） | Validation set（n=190） | t/z/χ 2 | *P-*value |
| --- | --- | --- | --- | --- | --- |
| Age  ≥60year  ＜60year | 115(18.08)  521(81.92) | 79(17.71)  367(82.29) | 36(18.95)  154(81.05) | 0.137 | 0.711 |
| Sex  male  female | 291(45.75)  345(54.25) | 202(45.29)  244(54.71) | 89(46.84)  101(53.16) | 0.129 | 0.719 |
| Smoking history  Yes  No | 100(15.72)  536(84.28) | 69(15.47)  377(84.53) | 31(16.32)  159(83.68) | 0.072 | 0.789 |
| ASA classification  ≥3  ＜3 | 177(27.83)  459(72.17) | 124(27.80)  322(72.20) | 53(27.89)  137(72.11) | 0.001 | 0.981 |
| BMI | 23.18±3.48 | 23.18±3.54 | 23.17±3.32 | 0.035 | 0.972 |
| Operative time  ＜3hour  ≥3hour | 41(6.45)  595(93.55) | 35(7.85)  411(92.15) | 6(3.16)  184(96.84) | 4.859 | 0.028 |
| GCS score  ＜13  ≥13 | 39(6.13)  597(93.87) | 22(4.93)  424(95.07) | 17(8.95)  173(91.05) | 3.731 | 0.053 |
| Mechanical ventilation time | 7.00(5.00-10.50) | 7.00(4.50-10.00) | 8.00(5.00-10.50) | 1.665 | 0.096 |
| Indwelling gastric tube  Yes  No | 66(10.38)  570(89.62) | 45(10.09)  401(89.91) | 21(11.05)  169(88.95) | 0.133 | 0.716 |
| Postoperative bedtime | 6.00(3.00-12.00) | 5.00(3.00-11.00) | 7.00(3.00-12.00) | 2.520 | 0.012 |
| Diabetes mellitus  Yes  No | 50(7.86)  586(92.14) | 38(8.52)  408(91.48) | 12(6.32)  178(93.68) | 0.894 | 0.344 |
| Pulmonary chronic disease  Yes  No | 4(0.63)  632(99.37) | 2(0.45)  444(99.55) | 2(1.05)  188(98.95) | 0.778 | 0.378 |

**Supplementary Table 1(Continued)**

| Variables | Total  （n=636） | Training set（n=446） | Validation set（n=190） | t/z/χ 2 | *P-*value |
| --- | --- | --- | --- | --- | --- |
| Cardiovascular disease  Yes  No | 99(15.57)  537(84.43) | 67(15.02)  379(84.98) | 32(16.84)  158(83.16) | 0.336 | 0.562 |
| Preoperative albumin | 39.55±3.39 | 39.60±3.57 | 39.45±2.94 | 0.489 | 0.625 |
| Preoperative prealbumin | 281.77±83.07 | 281.81±83.63 | 281.67±81.97 | 0.019 | 0.985 |
| Preoperative D-Dimer | 0.45(0.20-0.99) | 0.45(0.19-1.00) | 0.46(0.23-0.98) | 1.139 | 0.255 |
| Postoperative albumin | 33.72±4.19 | 33.73±4.23 | 33.68±4.11 | 0.158 | 0.875 |
| Postoperative prealbumin | 206.98±59.91 | 207.85±58.64 | 204.94±62.90 | 0.560 | 0.575 |
| Postoperative D-Dimer | 1.73(0.86-3.26) | 1.73(0.86-3.25) | 1.73(0.85-3.34) | -0.041 | 0.968 |

ASA, American Society of Anesthesiologists; BMI, Body Mass Index; GCS, Glasgow Coma Scale
