# Supplementary material for: Construction and validation of a risk prediction model for postoperative pulmonary infection in patients with brain tumor: a retrospective study
Source: PeerJ journal article supplement (doi:10.7717/peerj.18996), 2025-03-31
Supplement: variable_name.xlsx [file variable_name.xlsx]

## Sheet: Sheet1
var1	Age	≥60=1
var2	Sex	male=1
var3	Smoking history	Yes=1
var4	ASA classification	≥3=1
var5	Preoperative albumin
var6	Preoperative prealbumin
var7	Preoperative D-Dimer
var8	BMI
var9	Diabetes mellitus	Yes=1
var10	Pulmonary chronic disease	Yes=1
var11	Cardiovascular disease	Yes=1
var12	Operative time	≥3hour=1
var13	GCS score	＜13=1
var14	Mechanical ventilation time
var15	Indwelling gastric tube	Yes=1
var16	Postoperative bedtime
var17	Postoperative albumin
var18	Postoperative prealbumin
var19	Postoperative D-Dimer
end		pulmonary infection=1
